# Supplementary material
Source: PubMed Central journal article supplement (PMC3466971)
Supplement: supp_blood-2011-07-368720_blood-2011-07-368720-1.pdf [file supp_blood-2011-07-368720_blood-2011-07-368720-1.pdf]

# Suppl. Figure 1

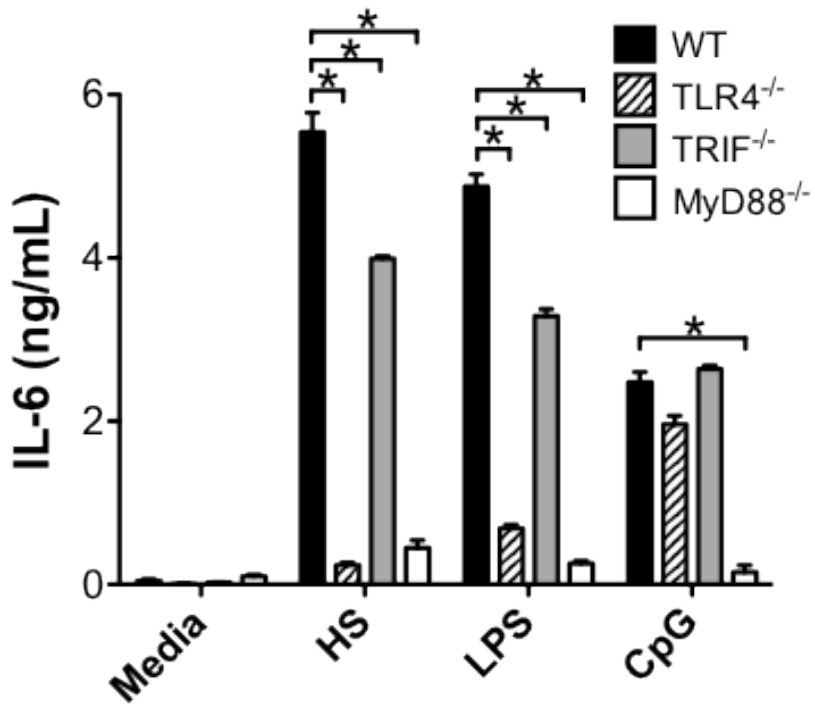

**Supplemental Figure 1. The intracellular adaptor molecule, TRIF, has a minor role in HS induction of IL-6 expression by DCs.** ELISA analysis of IL-6 production by WT, TLR4<sup>-/-</sup>, TRIF<sup>-/-</sup>, and MyD88<sup>-/-</sup> cultured C57BL/6 DCs (2 x 10<sup>5</sup>/well) incubated with HS (25 µg/mL), LPS (100 ng/mL) or CpG (10 µg/mL) for 24 hrs, \*p<0.05.

# Suppl. Figure 2

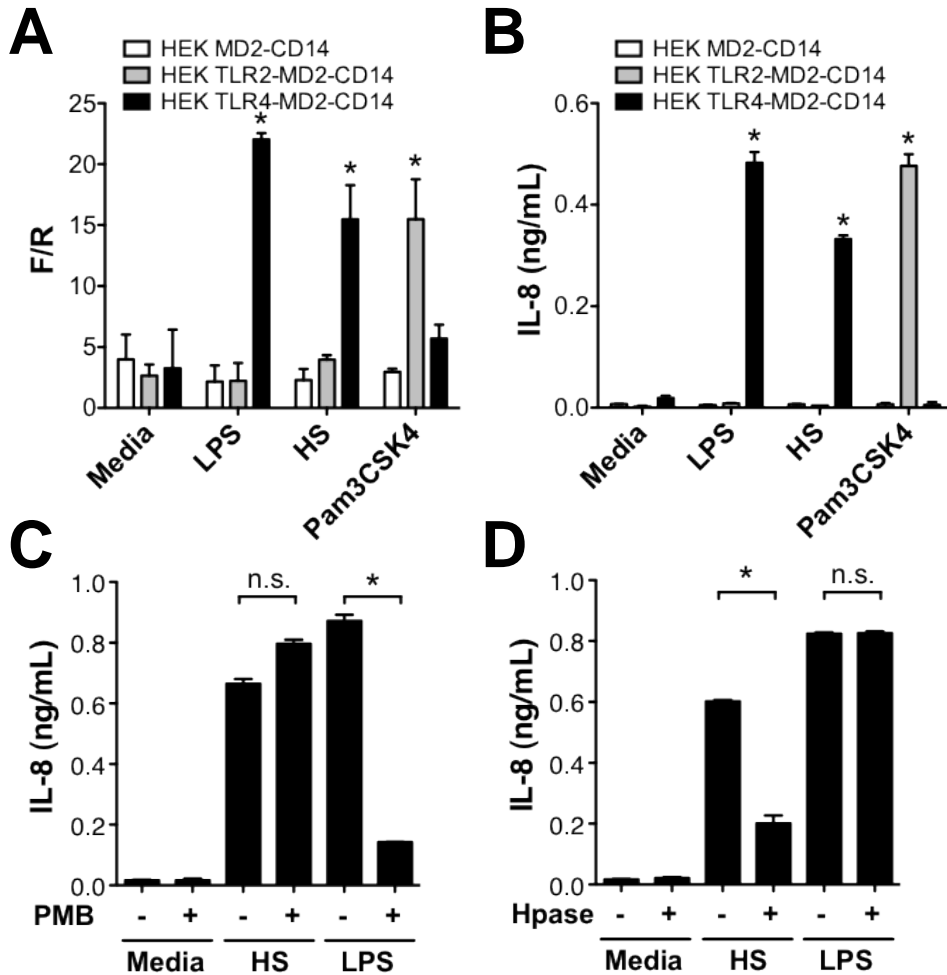

**Supplemental Figure 2. TLR4 is sufficient for HS induced activation of NF- $\kappa$ B and IL-8 expression.** HEK cell lines stably expressing CD14 and MD2 alone (HEK MD2-CD14), or co-expressed with human TLR2 (HEK TLR2-MD2-CD14) or human TLR4 (HEK TLR4-MD2-CD14) were transfected with a plasmid encoding firefly luciferase (F) under control of the NF- $\kappa$ B promoter along with a plasmid expressing Renilla luciferase (R) under control of the thymidine kinase promoter as a transfection control. Cell lines were cultured for 6 hours with media alone, LPS (100 ng/mL), HS (100  $\mu$ g/mL), or Pam3CSK4 (2  $\mu$ g/mL). (A) Cells were then lysed and the ratio of F/R was measured by dual luciferase reporter assay to determine NF- $\kappa$ B activation, \* $p$ <0.05 compared with media alone. (B) Supernatants were analyzed for IL-8 production by ELISA. (C) HEK TLR4-MD2-CD14 cells were tested for IL-8 production in response to LPS and HS +/- PMB or (D) +/- heparanase (Hpase), \* $p$ <0.05. Experiments were performed in triplicate or quadruplicate. Results are representative of two to three independent experiments.

# Suppl. Figure 3

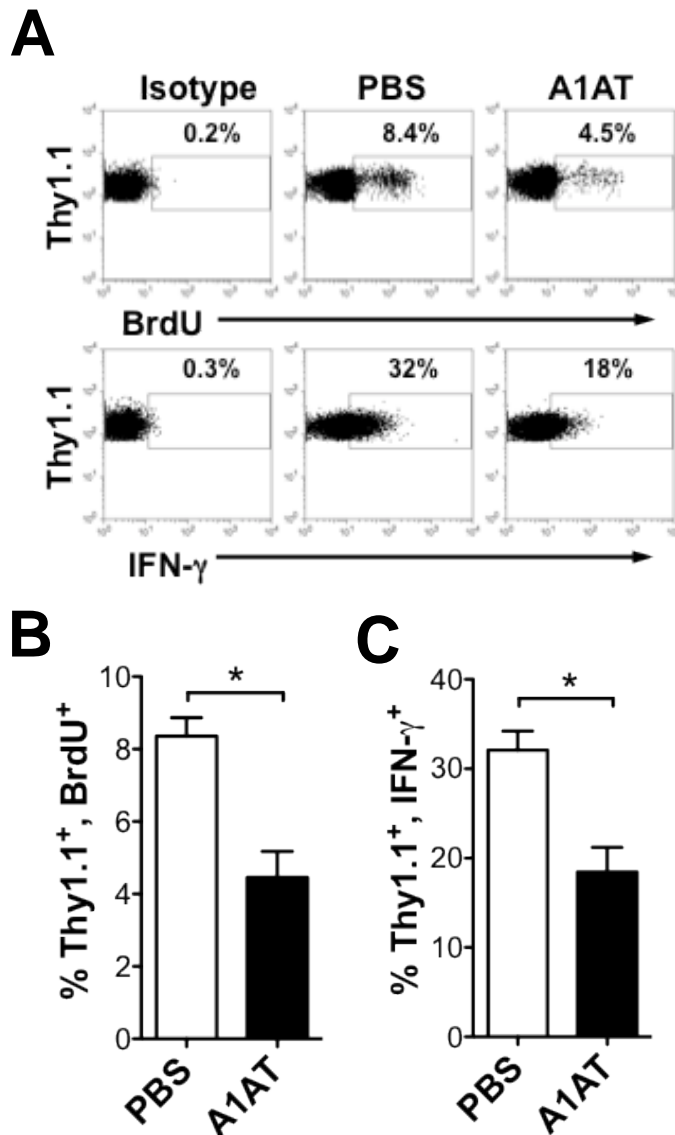

**Supplemental Figure 3. A1AT treatment decreases alloreactive T cell responses in Allo-HSCT recipients.** BALB/c Thy1.2 recipient of B10.D2 Thy1.1 Allo-BM+LC were treated with i.p. injections of A1AT (2 mg in PBS) or PBS control every 3 days, beginning 1 day prior to HSCT. (A) Six days after transplant, recipients were pulsed with BrdU and their splenocytes were FACS analyzed for BrdU incorporation and IFN-g production. Positive FACS gates were set by isotype antibody staining and plots are representative of 5 mice. Averages and SEM of Thy1.1<sup>+</sup> T cells positive for BrdU (B) and IFN-g (C) are plotted, \* $p < 0.05$ .
